# Supplementary material
Source: PubMed Central journal article supplement (PMC10067756)
Supplement: mmc1.pdf [file mmc1.pdf]

**Supplemental information**

**Association of branched-chain amino acids  
with mortality-the Ludwigshafen Risk  
and Cardiovascular Health (LURIC) study**

**Angela P. Moissl, Stefan Lorkowski, Andreas Meinitzer, Stefan Pilz, Hubert Scharnagl, Graciela E. Delgado, Marcus E. Kleber, Bernhard K. Krämer, Burkert Pieske, Martin R. Grübler, Helmut Brussee, Dirk von Lewinski, Hermann Toplak, Astrid Fahrleitner-Pammer, Winfried März, and Andreas Tomaschitz**

**A**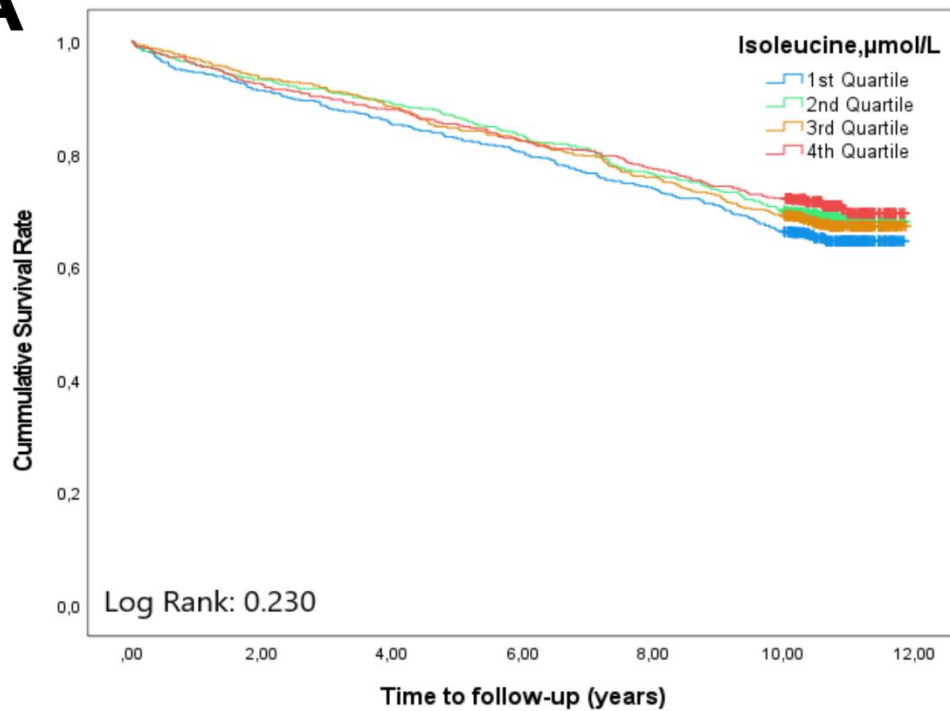**B**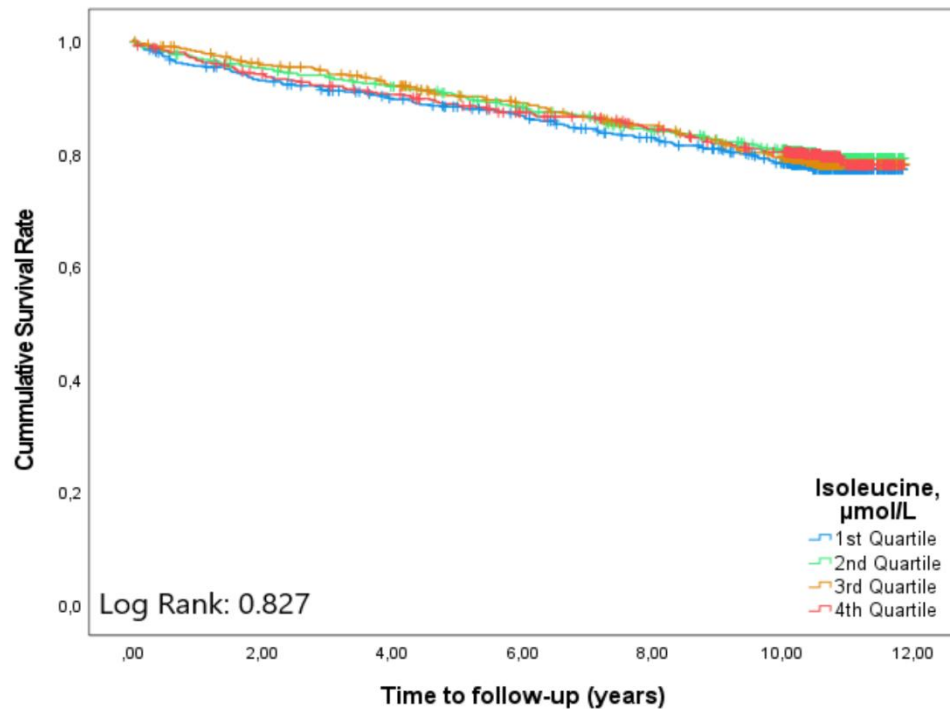

**Supplementary Figure SF1:** Kaplan-Meier curve according to serum isoleucine, related to the results part “Associations between baseline serum BCAA concentrations and outcomes” Figure 1.

**A)** Kaplan-Meier curve for the time to all-cause mortality according to serum Isoleucine concentrations in quartiles at baseline. **B)** Kaplan-Meier curve for the time to cardiovascular mortality according to serum Isoleucine concentrations in quartiles at baseline.

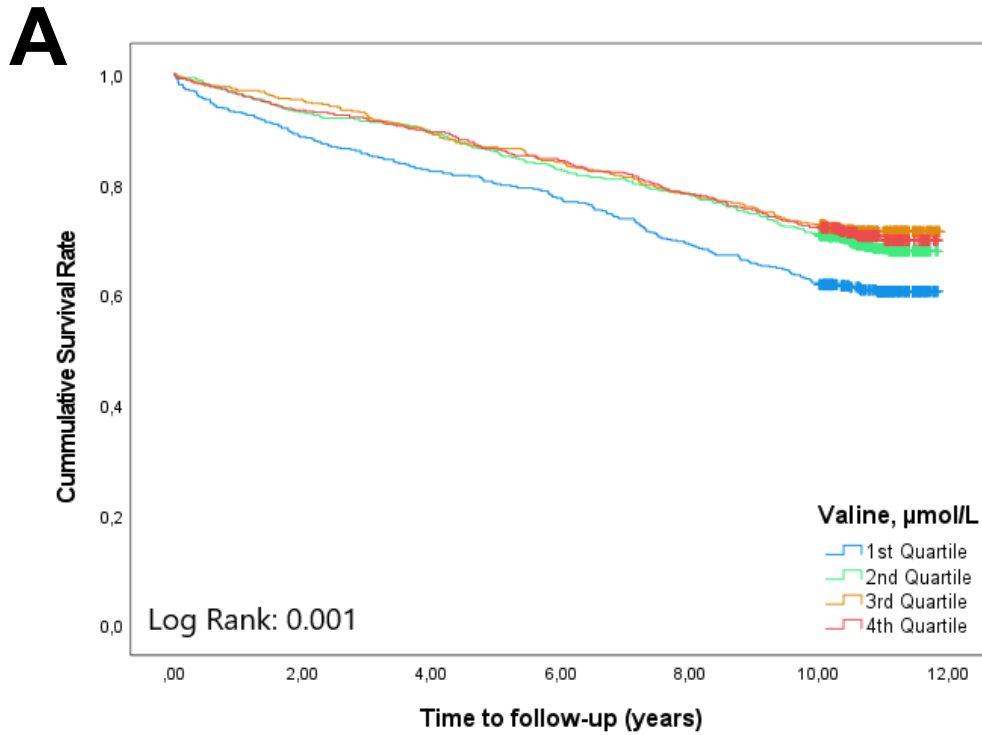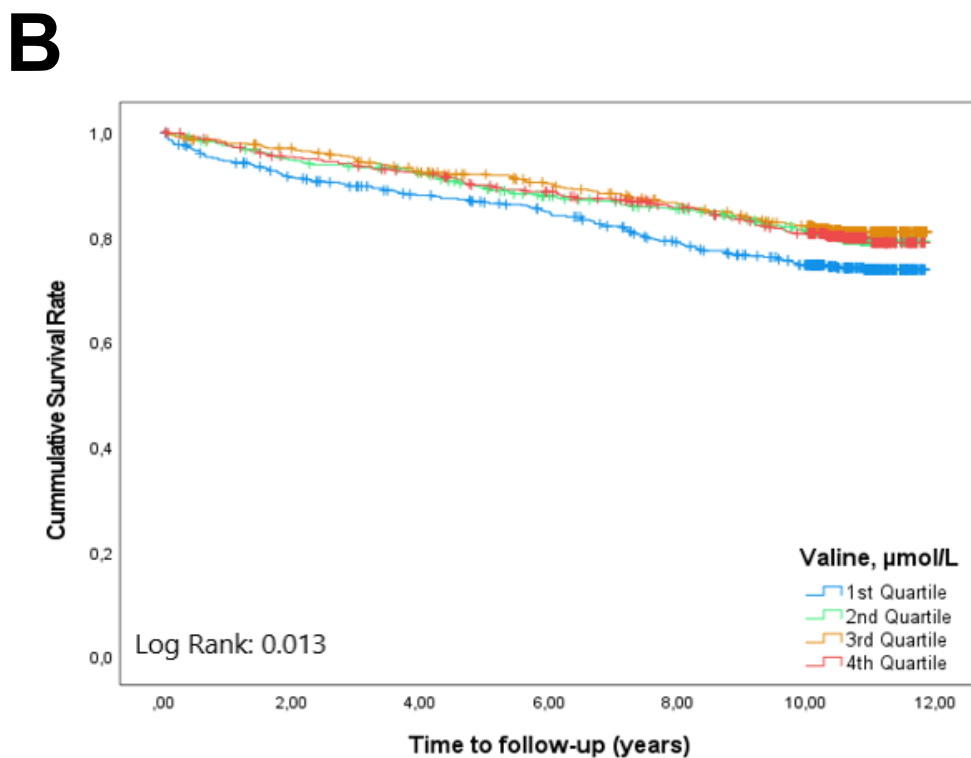

**Supplementary Figure SF2:** Kaplan-Meier curve according to serum valine, related to the results part “Associations between baseline serum BCAA concentrations and outcomes” Figure 1.

**A)** Kaplan-Meier curve for the time to all-cause mortality according to serum Valine concentrations in quartiles at baseline. **B)** Kaplan-Meier curve for the time to cardiovascular mortality according to serum Valine concentrations in quartiles at baseline.

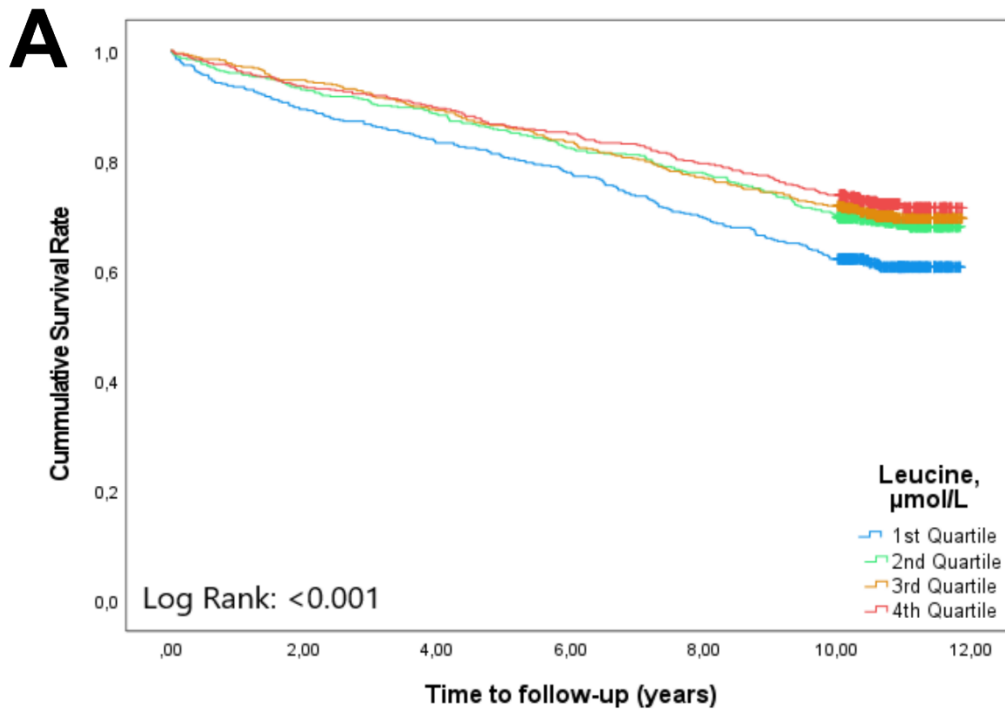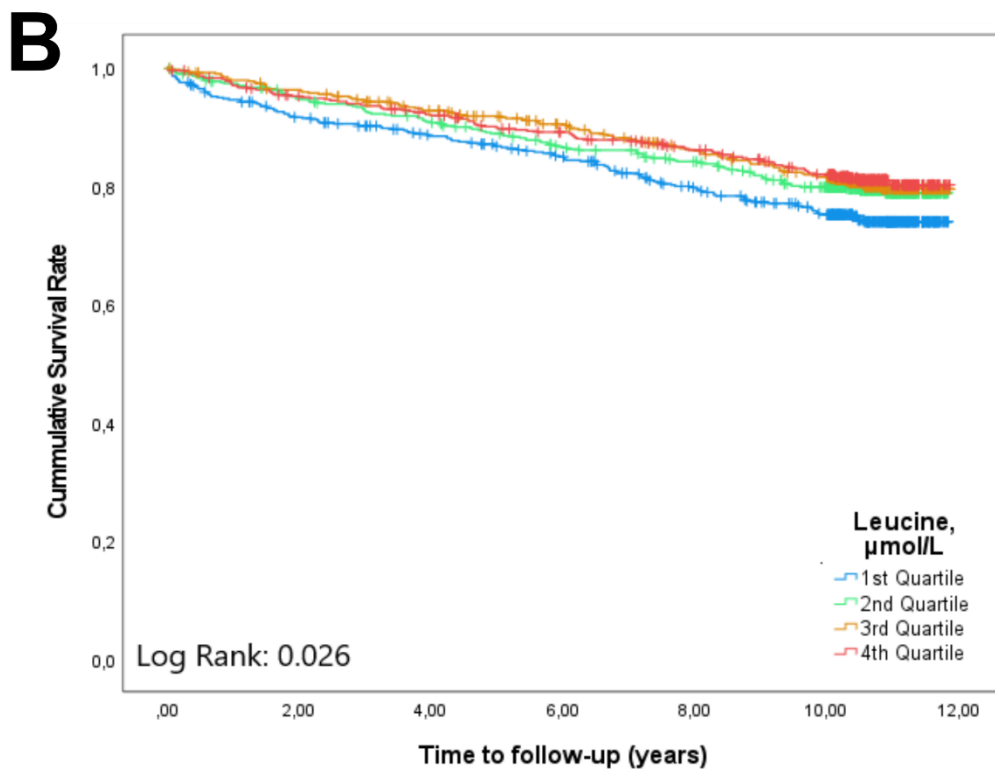

**Supplementary Figure SF3:** Kaplan-Meier curve according to serum leucine, related to the results part “Associations between baseline serum BCAA concentrations and outcomes” Figure 1.

**A)** Kaplan-Meier curve for the time to all-cause mortality according to serum Leucine concentrations in quartiles at baseline. **B)** Kaplan-Meier curve for the time to cardiovascular mortality according to serum Leucine concentrations in quartiles at baseline.

**Supplementary Table S1.** Multivariate hazard ratios for cardiovascular mortality per SD of BCAA stratified by potential moderators, related to the results part “BCAA concentration associated cardiovascular mortality in various subgroups”.

| Group                                                    | n/Events          | Hazard ratio (95% CI) | p-Value | p-Value for interaction |
|----------------------------------------------------------|-------------------|-----------------------|---------|-------------------------|
|                                                          |                   | <i>P</i> <0.001       |         |                         |
| All                                                      | 2142/433 (20.2 %) | 0.76 (0.68-0.85)      | < 0.001 | -                       |
| Age, y ( <i>median</i> )                                 |                   |                       |         | 0.314                   |
| < 63.5                                                   | 1081/109 (10.1 %) | 0.70 (0.57-0.86)      | < 0.001 |                         |
| ≥ 63.5                                                   | 1061/324 (30.5 %) | 0.84 (0.74-0.95)      | 0.006   |                         |
| Sex                                                      |                   |                       |         | 0.216                   |
| Male                                                     | 1568/326 (20.8 %) | 0.78 (0.69-0.89)      | < 0.001 |                         |
| Female                                                   | 625/117 (18.7 %)  | 0.70 (0.55-0.87)      | 0.002   |                         |
| BMI, kg/m <sup>2</sup>                                   |                   |                       |         | 0.595                   |
| < 25.0                                                   | 635/131 (20.6 %)  | 0.79 (0.65-0.97)      | 0.025   |                         |
| ≥ 25.0                                                   | 1507/302 (20.0 %) | 0.75 (0.66-0.85)      | < 0.001 |                         |
| HOMA-IR ( <i>median</i> )                                |                   |                       |         | 0.506                   |
| < 2.2                                                    | 1047/165 (15.8 %) | 0.63 (0.52-0.77)      | < 0.001 |                         |
| ≥ 2.2                                                    | 1021/250 (24.5 %) | 0.83 (0.72-0.95)      | 0.008   |                         |
| Diabetes                                                 |                   |                       |         |                         |
| No                                                       | 1393/187 (13.4 %) | 0.77 (0.64-0.92)      | 0.004   |                         |
| Yes                                                      | 812/256 (31.5 %)  | 0.76 (0.66-0.87)      | < 0.001 |                         |
| Haemoglobin A <sub>1c</sub> , mmol/mol ( <i>median</i> ) |                   |                       |         | 0.223                   |
| < 41.0                                                   | 1107/148 (13.3 %) | 0.79 (0.66-0.96)      | 0.016   |                         |
| ≥ 41.0                                                   | 1035/285 (27.5 %) | 0.80 (0.70-0.91)      | < 0.001 |                         |
| Coronary artery disease                                  |                   |                       |         |                         |
| No                                                       | 654/69 (10.6 %)   | 0.77 (0.59-1.02)      | 0.069   |                         |
| Yes                                                      | 1488/364 (24.5 %) | 0.77 (0.68-0.87)      | < 0.001 |                         |
| Arterial hypertension                                    |                   |                       |         | 0.973                   |
| No                                                       | 576/85 (14.8 %)   | 0.77 (0.59-1.00)      | 0.051   |                         |
| Yes                                                      | 1566/348 (22.2 %) | 0.76 (0.67-0.86)      | < 0.001 |                         |
| Triglycerides, mmol/l ( <i>median</i> )                  |                   |                       |         | 0.530                   |
| < 1.7                                                    | 1120/221 (19.7 %) | 0.66 (0.56-0.77)      | < 0.001 |                         |
| ≥ 1.7                                                    | 1022/212 (20.7 %) | 0.94 (0.81-1.09)      | 0.395   |                         |

|                                     |                   |                  |         |         |
|-------------------------------------|-------------------|------------------|---------|---------|
| LDL-cholesterol,<br>mmol/l (median) |                   |                  |         | 0.832   |
| < 2.9                               | 1064/217 (20.4 %) | 0.85 (0.73-0.98) | 0.030   |         |
| ≥ 2.9                               | 1078/216 (20.0 %) | 0.75 (0.64-0.88) | < 0.001 |         |
| Adiponectin, μM<br>(median)         |                   |                  |         | 0.003   |
| < 8.3                               | 1047/176 (16.8 %) | 0.90 (0.76-1.06) | 0.199   |         |
| ≥ 8.3                               | 1031/245 (23.8 %) | 0.78 (0.67-0.90) | < 0.001 |         |
| NYHA                                |                   |                  |         | 0.015   |
| I/II                                | 1698/291 (17.1 %) | 0.82 (0.72-0.94) | 0.004   |         |
| III/IV                              | 444/142 (32.0 %)  | 0.67 (0.55-0.81) | < 0.001 |         |
| NT-pro-BNP, pg /ml<br>(median)      |                   |                  |         | < 0.001 |
| < 293.5                             | 1062/89 (8.4 %)   | 0.75 (0.59-0.97) | 0.025   |         |
| ≥ 293.5                             | 1061/339 (32.0 %) | 0.86 (0.77-0.97) | 0.015   |         |
| Galectin-3, ng/ml<br>(median)       |                   |                  |         | 0.161   |
| < 13.9                              | 716/118 (16.5 %)  | 0.86 (0.70-1.05) | 0.139   |         |
| ≥ 13.9                              | 723/174 (24.1 %)  | 0.76 (0.63-0.91) | < 0.003 |         |
| Homoarginine,<br>μmol/l (median)    |                   |                  |         | < 0.001 |
| < 2.4                               | 1013/287 (28.3 %) | 0.80 (0.71-0.92) | 0.001   |         |
| ≥ 2.4                               | 1119/144 (12.9 %) | 0.92 (0.75-1.10) | 0.382   |         |
| Smoking status                      |                   |                  |         | 0.576   |
| No                                  | 1741/372 (21.4 %) | 0.78 (0.70-0.88) | < 0.001 |         |
| Yes                                 | 1566/348 (22.2 %) | 0.76 (0.67-0.86) | < 0.001 |         |
| Haemoglobin, g/dl<br>(median)       |                   |                  |         | 0.551   |
| < 13.8                              | 998/240 (24.1 %)  | 0.73 (0.63-0.85) | < 0.001 |         |
| ≥ 13.8                              | 1144/193 (16.9 %) | 0.78 (0.66-0.91) | 0.002   |         |
| De Ritis ratio<br>(median)          |                   |                  |         | 0.948   |
| < 0.8                               | 1110/202 (18.2 %) | 0.79 (0.67-0.93) | 0.005   |         |
| ≥ 0.8                               | 1032/231 (22.4 %) | 0.74 (0.64-0.86) | < 0.001 |         |

---

**Supplementary Table S2:** Hazard ratios (95% CI) for ten-year specific causes of cardiovascular death, related to STAR Methods”.

| <b>Fatal myocardial infarction</b>           |                  |                  |                  |              |                  |        |
|----------------------------------------------|------------------|------------------|------------------|--------------|------------------|--------|
| Event rate (%)                               | 3.4 (19/559)     | 4.8 (27/559)     | 3.2 (18/559)     | 2.7 (15/559) | -                | -      |
| Crude                                        | 1.42 (0.72-2.79) | 1.86 (0.99-3.50) | 1.21 (0.61-2.39) | 1.00 (ref)   | 0.85 (0.67-1.07) | 0.156  |
| Model 1                                      | 1.84 (0.92-3.65) | 2.12 (1.12-3.97) | 1.23 (0.62-2.43) | 1.00 (ref)   | 0.76 (0.60-0.97) | 0.028  |
| Model 2                                      | 2.74 (1.29-5.81) | 2.76 (1.40-5.41) | 1.52 (0.76-3.05) | 1.00 (ref)   | 0.65 (0.50-0.85) | 0.001  |
| Model 3                                      | 2.49 (1.15-5.36) | 2.55 (1.29-5.03) | 1.49 (0.74-3.01) | 1.00 (ref)   | 0.68 (0.52-0.89) | 0.006  |
| <b>Sudden cardiac death</b>                  |                  |                  |                  |              |                  |        |
| Event rate (%)                               | 9.3 (52/559)     | 5.7 (32/559)     | 7.5 (42/559)     | 8.6 (48/559) | -                | -      |
| Crude                                        | 1.20 (0.81-1.78) | 0.68 (0.44-1.07) | 0.88 (0.58-1.33) | 1.00 (ref)   | 0.92 (0.79-1.08) | 0.301  |
| Model 1                                      | 1.43 (0.96-2.13) | 0.76 (0.48-1.18) | 0.86 (0.57-1.31) | 1.00 (ref)   | 0.87 (0.74-1.02) | 0.077  |
| Model 2                                      | 2.13 (1.37-3.30) | 0.94 (0.59-1.51) | 0.97 (0.63-1.49) | 1.00 (ref)   | 0.74 (0.62-0.88) | <0.001 |
| Model 3                                      | 2.03 (1.30-3.17) | 0.94 (0.59-1.51) | 1.00 (0.65-1.54) | 1.00 (ref)   | 0.75 (0.63-0.89) | 0.001  |
| <b>Death due to congestive heart failure</b> |                  |                  |                  |              |                  |        |
| Event rate (%)                               | 5.2 (29/559)     | 5.7 (32/559)     | 3.6 (20/559)     | 4.8 (27/559) | -                | -      |
| Crude                                        | 1.20 (0.71-2.02) | 1.22 (0.73-2.04) | 0.74 (0.42-1.32) | 1.00 (ref)   | 0.93 (0.76-1.12) | 0.414  |
| Model 1                                      | 1.36 (0.80-2.32) | 1.34 (0.80-2.24) | 0.71 (0.40-1.27) | 1.00 (ref)   | 0.88 (0.72-1.08) | 0.218  |
| Model 2                                      | 2.12 (1.19-3.78) | 1.86 (1.09-3.19) | 0.89 (0.50-1.60) | 1.00 (ref)   | 0.74 (0.60-0.93) | 0.008  |
| Model 3                                      | 2.06 (1.14-3.71) | 1.89 (1.15-3.71) | 0.90 (0.50-1.62) | 1.00 (ref)   | 0.76 (0.61-0.94) | 0.013  |
